# Supplementary material for: The facile boosting sunlight-driven photocatalytic performance of a metal–organic-framework through coupling with Ag2S nanoparticles
Source: Royal Society of Chemistry journal article supplement (doi:10.1039/d0nj02030c), 2020-01-01
Supplement: d0nj02030c1.pdf [file d0nj02030c1.pdf]

## Supporting Information

### Facile boosting sunlight-driven photocatalytic performance of metal-organic-framework through coupling with Ag<sub>2</sub>S nanoparticles

Linlin Deng<sup>1</sup>, Dongguang Yin<sup>1\*</sup>, Kyu Kyu Khaing<sup>1</sup>, Songtao Xiao<sup>2\*</sup>, Luqiu Li<sup>1</sup>, Xiandi Guo<sup>1</sup>, Jun Wang<sup>1</sup>, Yong Zhang<sup>1\*</sup>

<sup>1</sup>*School of Environmental and Chemical Engineering, Shanghai University, Shanghai, 200444, China*

<sup>2</sup>*China Institute of Atomic Energy, Beijing, P. O. Box 275-26, 102413, China*

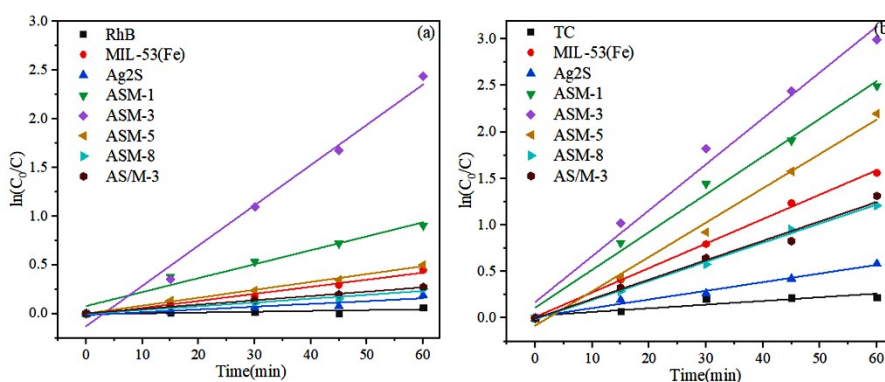

Figure S1. The pseudo-first-order kinetic plots for the degradation of (a) Rhb, (b) (TC).

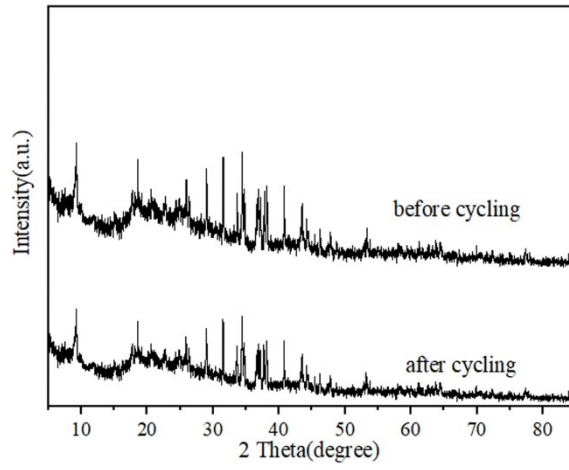

Figure S2. XRD pattern of the ASM-3 after the cycling tests for photocatalytic degradation of RhB.
